# Supplementary material for: Potent Inhibition of Severe Acute Respiratory Syndrome Coronavirus 2 (SARS-CoV-2) by photosensitizers
Source: Research Square preprint supplement (doi:10.21203/rs.3.rs-152985/v1), 2021-02-08
Supplement: Supplementary file 1 [file afe7b7d92c46361f8b7a203f.docx]

**Supplemental information**

**For**

**Potent Inhibition of Severe Acute Respiratory Syndrome Coronavirus 2 (SARS-CoV-2) by photosensitizers**

Shujuan Yu1, Gaohui Sun1, Yaqun Sui 1, Hanlin Li1, Ning Zhang2, Yuhai Bi2,3, George F. Gao2,3, Peng Xu4, Longguang Jiang1, Cai Yuan4*, Yang Yang5*, Mingdong Huang1*

1College of Chemistry, Fuzhou University, Fujian 350108, China

2CAS Key Laboratory of Pathogenic Microbiology and Immunology, Institute of Microbiology, Center for Influenza Research and Early-warning (CASCIRE), CAS-TWAS Center of Excellence for Emerging Infectious Diseases (CEEID), Chinese Academy of Sciences, Beijing 100101, China

3University of Chinese Academy of Sciences, Beijing 101408, China

4College of Biological Science and Engineering, Fuzhou University, Fuzhou, Fujian, 350108, China

5Shenzhen Key Laboratory of Pathogen and Immunity, National Clinical Research Center for infectious disease, State Key Discipline of Infectious Disease, Shenzhen Third People's Hospital, Second Hospital Affiliated to Southern University of Science and Technology, Shenzhen, China

*Corresponding authors.


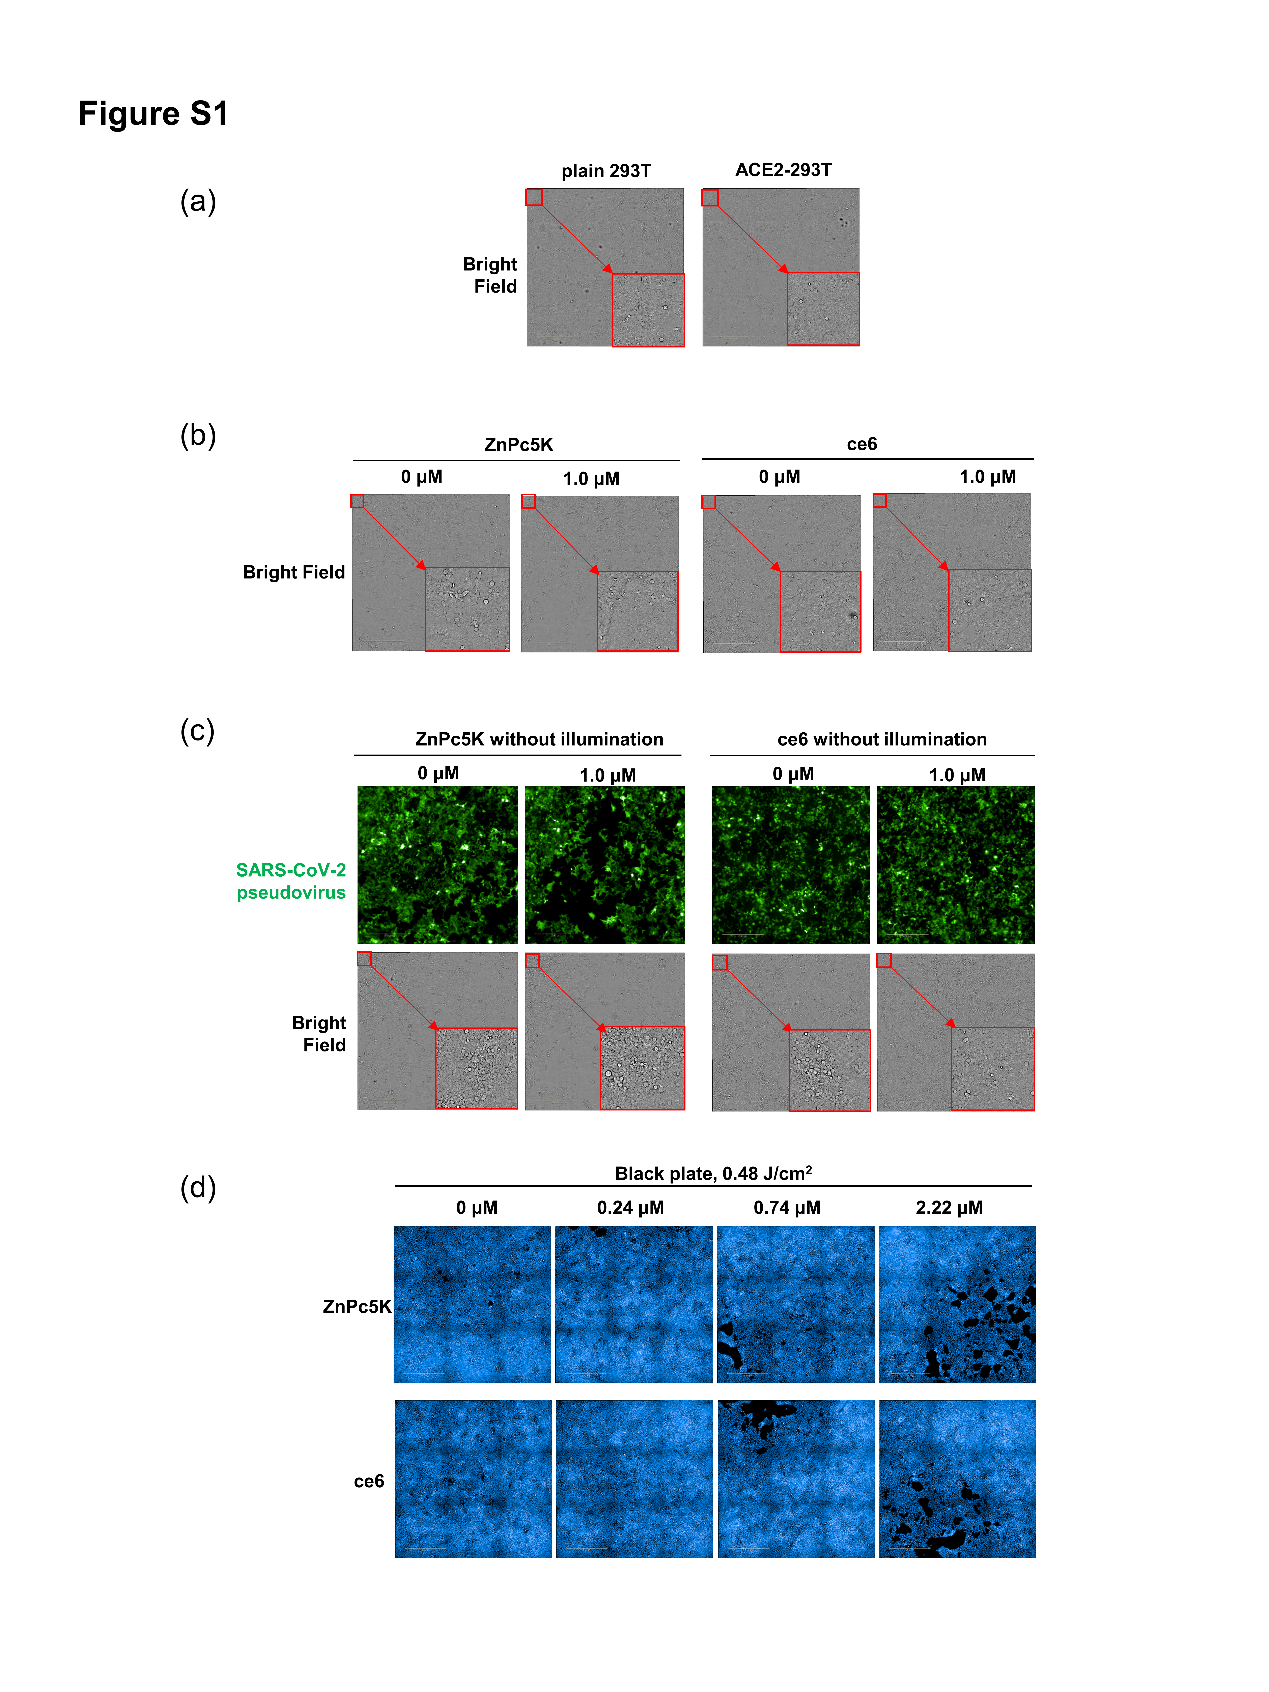


**Figure S1. Additional data and control experiments for Fig. 1.**

(a) The bright field images of ACE2-293T cells in Figure 1b experiments showing the normal cell morphology. (b) The bright field images of Figure 1c showed that photosensitizers did not affect cell morphology. (c) The control groups for Figure 1c without illumination showed normal cell proliferation. (d) The nuclear staining images of Figure 1d showed the normal cell morphology after photodynamic treatment. Scale bar, 500 μm.


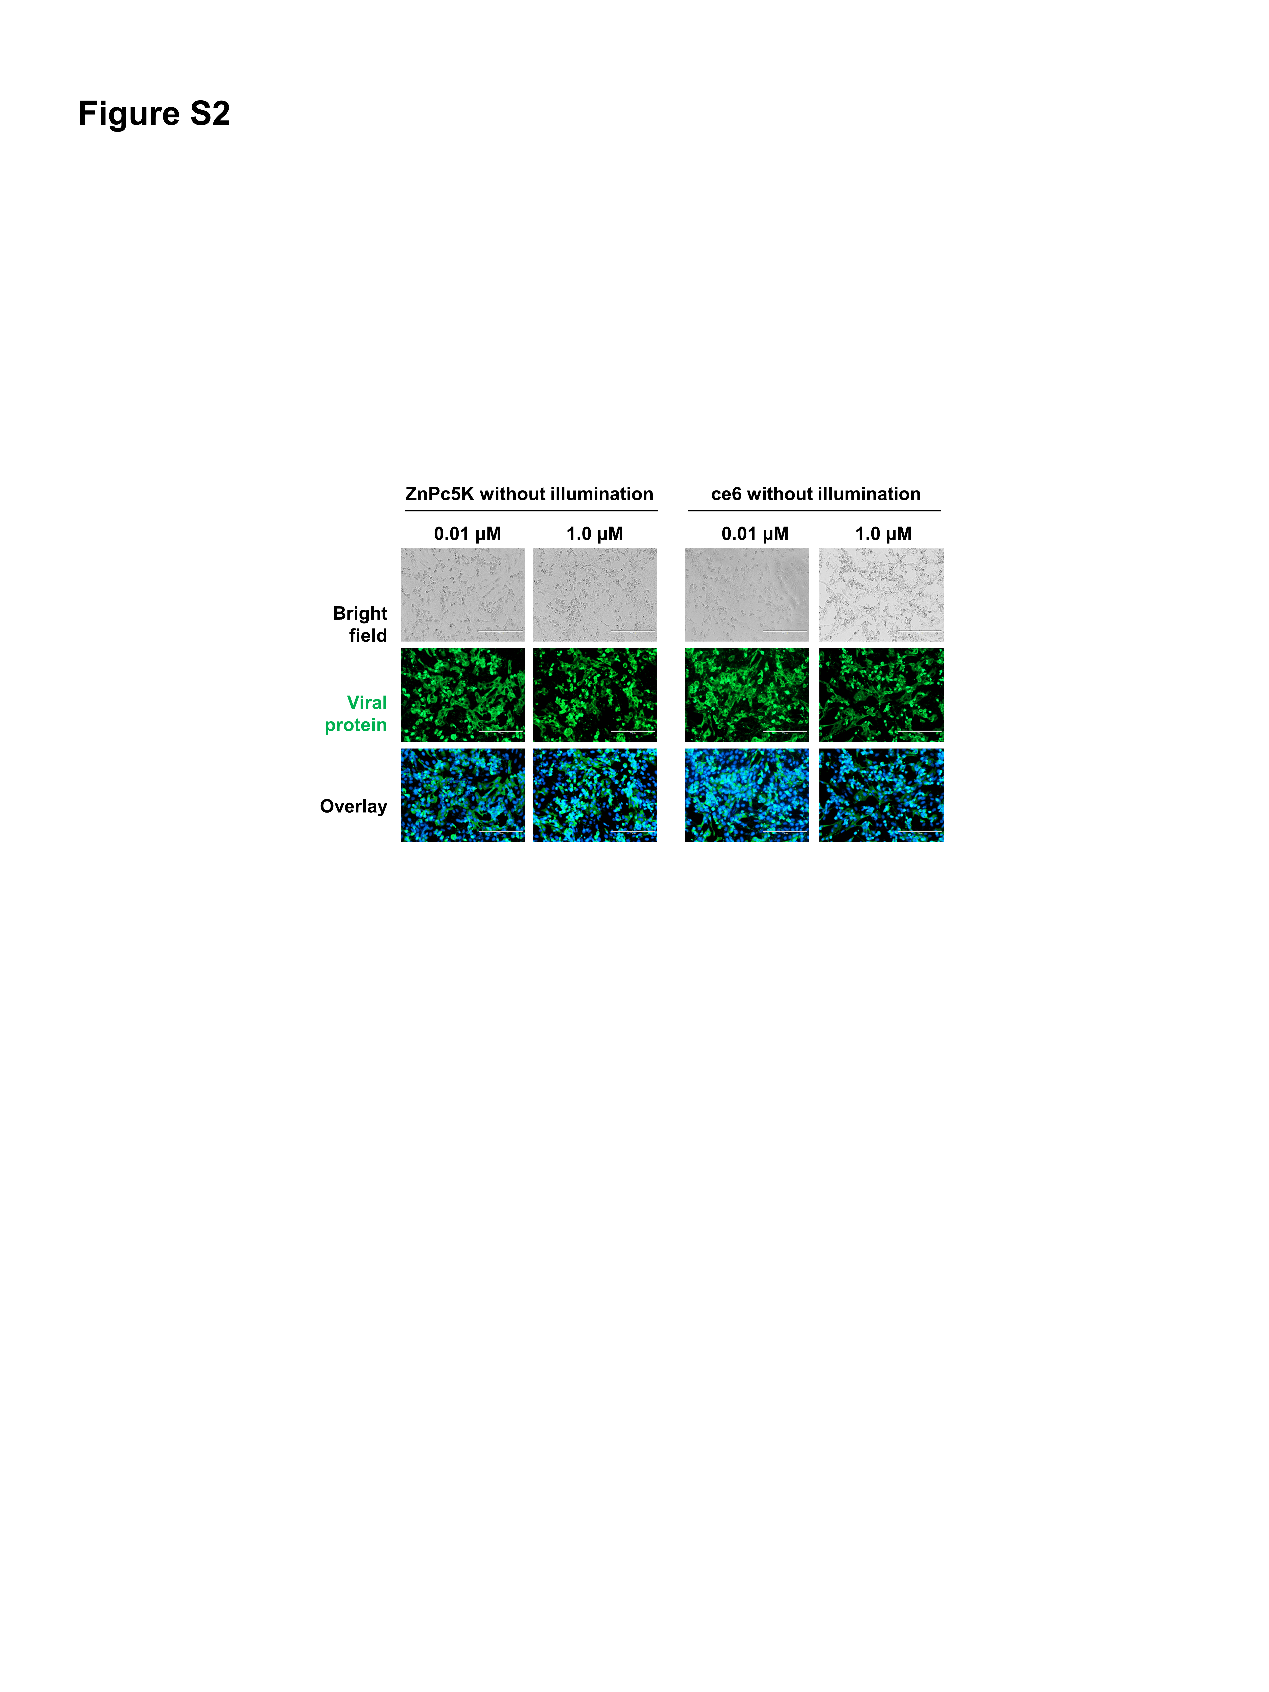


**Figure S2. Photosensitizers had no effect on SARS-CoV-2 viruses in the absence of LED illumination under the conditions the same as in Fig.2b.**


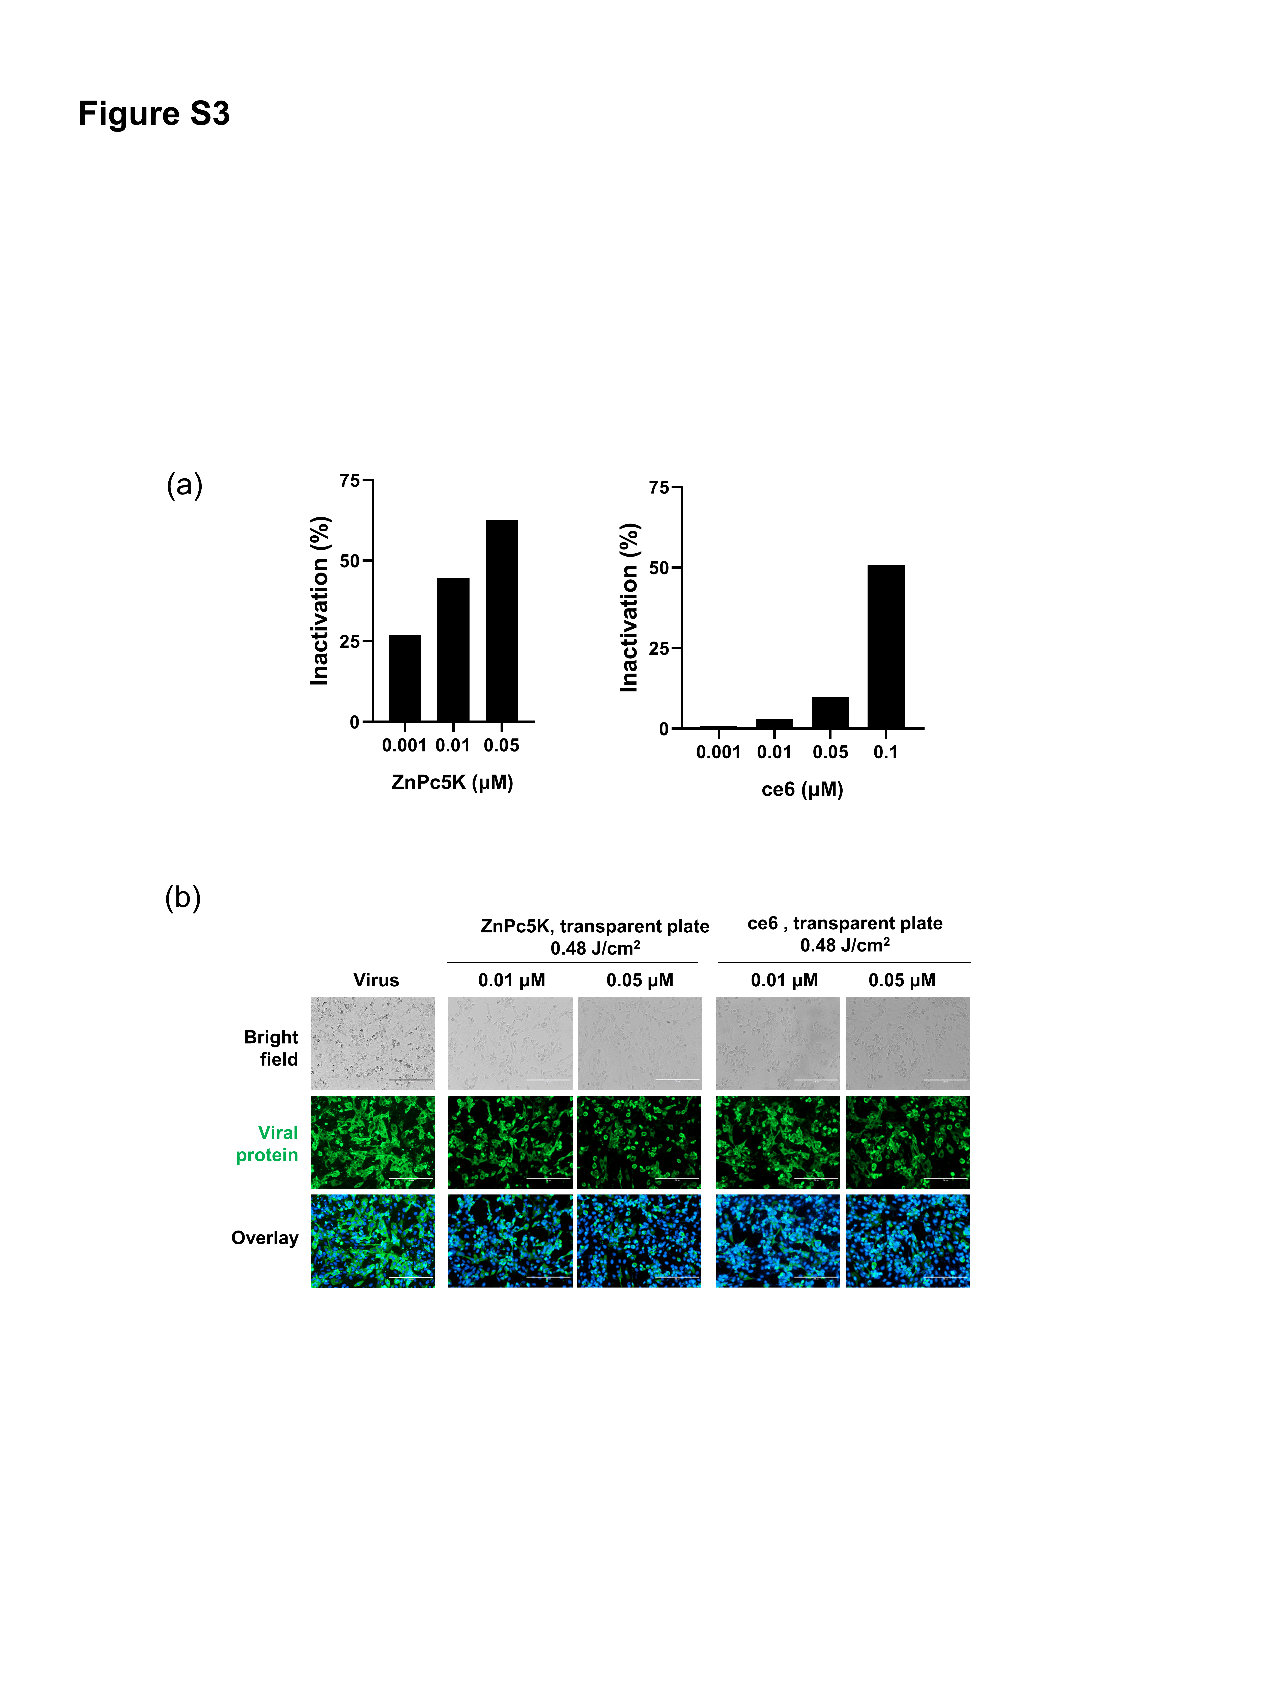


**Figure S3. Photosensitizers inactivates live virus inside cells.** (a) Quantification of the inactivation percentage of live virus by qRT-PCR. (b) Immunofluorescence microscopic images of virus infection upon treatment of ZnPc5K and ce6 at the indicated concentrations with LED illumination showed no toxicity to the host cells. The images were taken at 48 h.p.i. Scale bar, 200 μm. Cells were stained with the viral protein (green) and nuclei (blue).


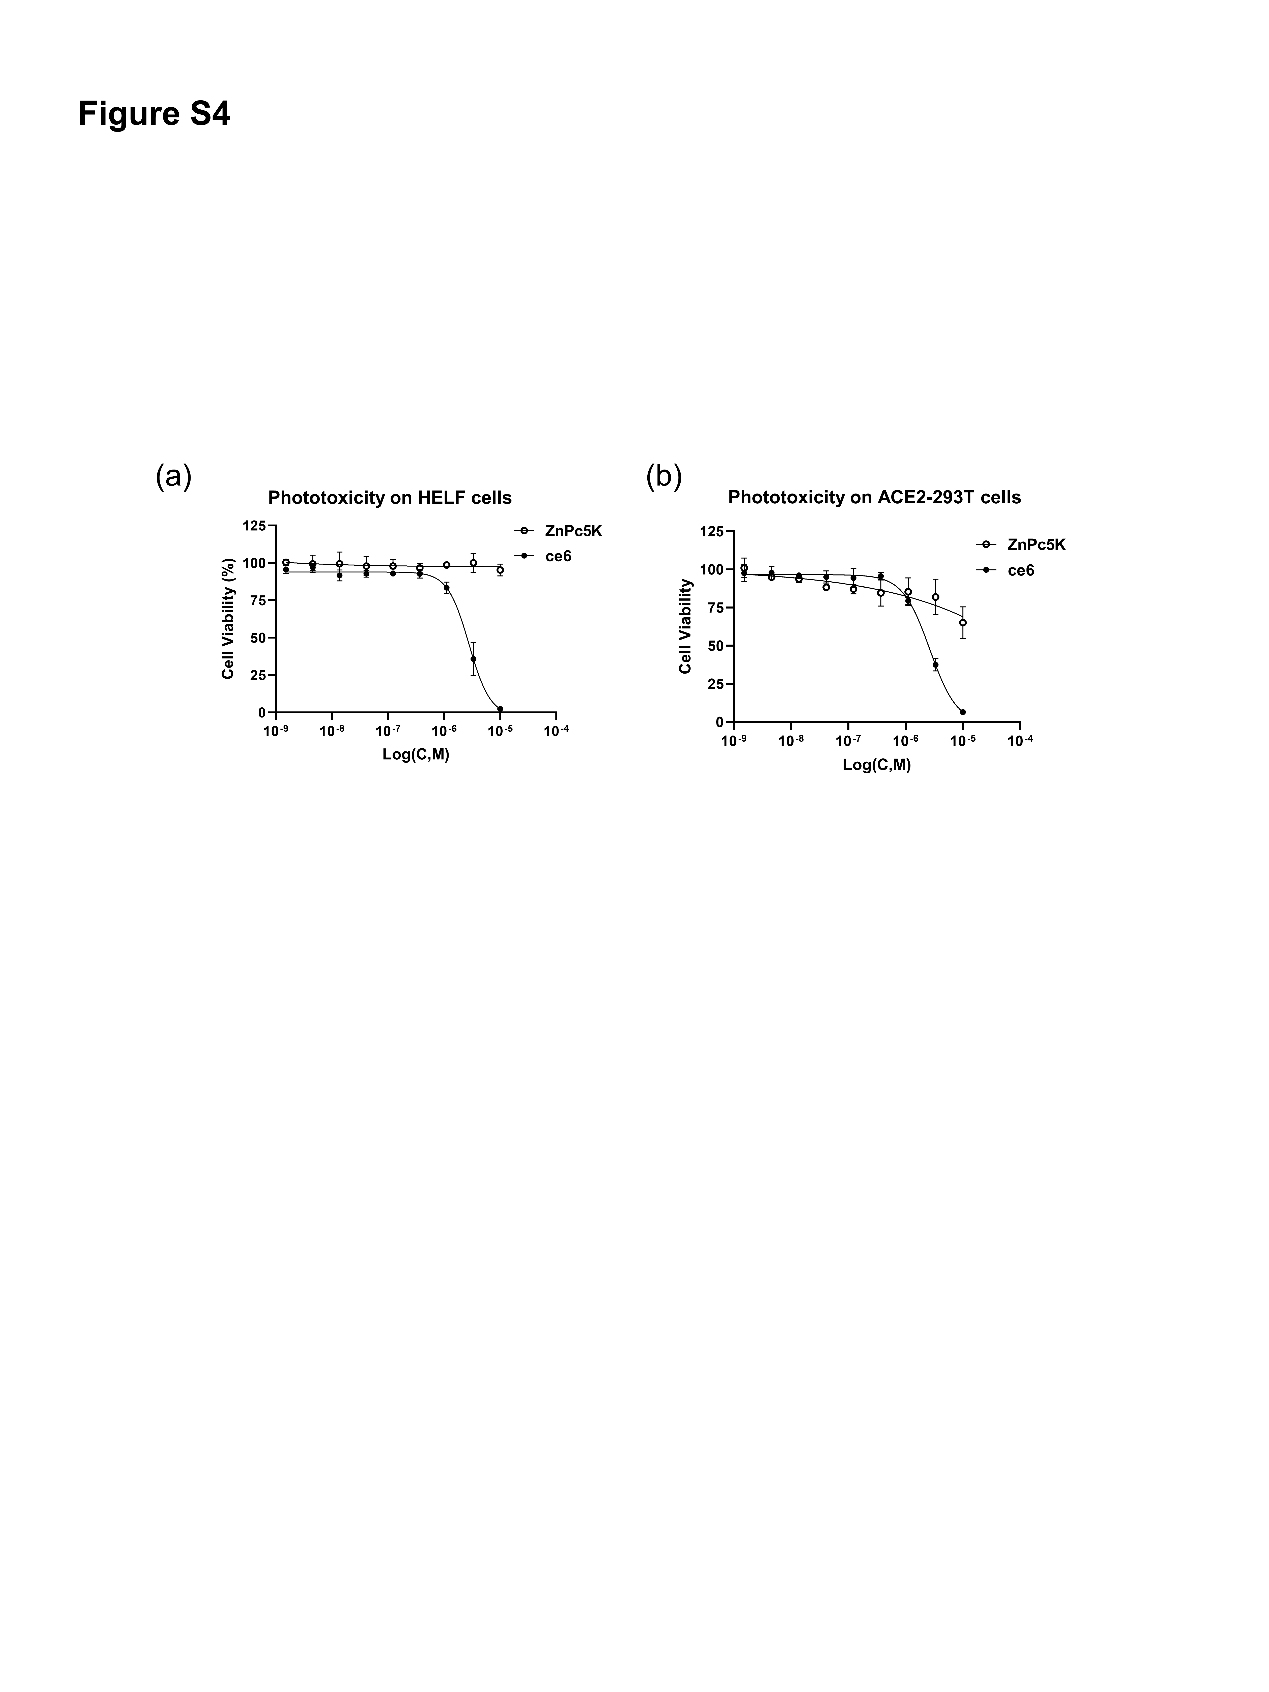


**Figure S4. Phototoxicity of photosensitizers to HELF cells and ACE2-293T cells.** Photocytotoxicity of ZnPc5K and ce6 to HELF (a) or ACE2-293T (b) cells was measured by CCK-8 assay.
